# Supplementary material
Source: Springer Nature journal article supplement (https://www.springermedizin.de/resource/supplementary/12959_2014_226_MOESM2_ESM.pdf/9569300)

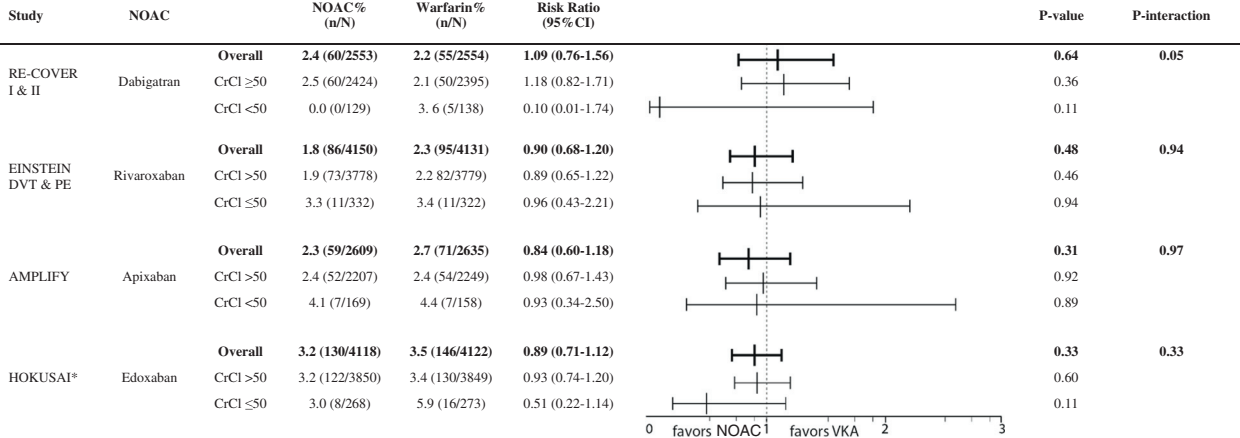

CrCl: Creatinine clearance (ml/min); \*Numbers given for the overall study period

Supplement: MOESM2 [file 9569300]
